# Supplementary material
Source: MDPI journal article supplement (https://www.mdpi.com/1424-8247/15/5/577)
Supplement: s1 [file s1]

**Table S1.** List of differentially downregulated miRNAs in HULM-EXO compared to UTSM-EXO

| miRNA             | Log FC     | P value     | FDR        |
|-------------------|------------|-------------|------------|
| hsa-miR-152-3p    | -0.6171983 | 0.044064243 | 0.14976265 |
| has-miR-30c-5p    | -0.6244887 | 0.018638442 | 0.07200607 |
| hsa-miR-29a-3p    | -0.6812954 | 0.001393438 | 0.00779454 |
| hsa-miR-181a-5p   | -0.8437619 | 0.003043485 | 0.01527431 |
| hsa-miR-27b-3p    | -0.8550467 | 0.000191049 | 0.00136791 |
| hsa-miR-941       | -0.8669564 | 0.014002782 | 0.05762    |
| hsa-miR-224-5p    | -0.8907374 | 0.001273641 | 0.00719942 |
| hsa-miR-744-5p    | -0.9034923 | 0.025964196 | 0.09420793 |
| hsa-miR-654-3p    | -0.9044126 | 0.023508844 | 0.0876684  |
| hsa-miR-27a-3p    | -0.9622595 | 8.22E-05    | 0.00060453 |
| hsa-miR-24-3p     | -1.0148283 | 8.06E-06    | 7.21E-05   |
| hsa-miR-29b-3p    | -1.0271054 | 1.23E-06    | 1.27E-05   |
| hsa-miR-28-3p     | -1.0505567 | 0.005047699 | 0.02357056 |
| hsa-miR-23a-3p    | -1.1126003 | 3.44E-07    | 3.70E-06   |
| hsa-miR-130a-3p   | -1.1357986 | 0.008781508 | 0.03833878 |
| hsa-miR-23b-3p    | -1.237715  | 1.07E-05    | 9.40E-05   |
| hsa-miR-320c      | -1.3507584 | 0.000262323 | 0.00182945 |
| hsa-miR-7-5p      | -1.4017724 | 1.54E-07    | 1.76E-06   |
| hsa-miR-30a-5p    | -1.4310428 | 5.91E-08    | 7.25E-07   |
| hsa-miR-181a-2-3p | -1.4756243 | 0.007180229 | 0.03240154 |
| hsa-miR-320b      | -1.4973795 | 4.80E-05    | 0.00039641 |
| hsa-miR-143-3p    | -1.5006143 | 1.09E-11    | 1.78E-10   |
| hsa-miR-22-3p     | -1.5243372 | 4.87E-07    | 5.13E-06   |
| hsa-miR-181b-5p   | -1.5917024 | 1.27E-06    | 1.29E-05   |
| hsa-miR-197-3p    | -1.5929096 | 0.005823769 | 0.02672961 |
| hsa-miR-136-5p    | -1.5984208 | 0.000418716 | 0.00270904 |
| hsa-miR-190a-5p   | -1.7061308 | 0.001255385 | 0.00719942 |
| hsa-miR-503-5p    | -1.7408825 | 0.001847602 | 0.0101241  |
| hsa-miR-1296-5p   | -1.7554006 | 0.010113281 | 0.04276246 |
| hsa-miR-143-5p    | -2.0170247 | 0.001822828 | 0.01009133 |
| hsa-miR-6087      | -2.0435692 | 5.94E-08    | 7.25E-07   |
| hsa-miR-424-5p    | -2.3900127 | 3.37E-10    | 4.90E-09   |
| hsa-miR-7704      | -2.542874  | 0.016084066 | 0.06543291 |
| hsa-miR-146a-5p   | -2.5996335 | 1.37E-05    | 0.0001184  |
| hsa-miR-145-5p    | -2.6264697 | 2.50E-17    | 5.16E-16   |
| hsa-miR-660-5p    | -2.7726722 | 0.013951236 | 0.05762    |
| hsa-miR-320d      | -2.8440097 | 2.33E-07    | 2.55E-06   |
| hsa-miR-323b-3p   | -2.940843  | 0.007880255 | 0.03468604 |
| hsa-miR-34a-5p    | -3.147216  | 1.31E-25    | 4.39E-24   |
| hsa-miR-324-3p    | -3.9874603 | 0.000667207 | 0.00407148 |
| hsa-miR-4508      | -4.2397756 | 3.60E-18    | 7.74E-17   |
| hsa-miR-335-5p    | -4.5554876 | 1.35E-24    | 4.03E-23   |
| hsa-miR-137       | -4.6679459 | 2.46E-10    | 3.67E-09   |
| hsa-miR-3180      | -5.8461076 | 0.03361661  | 0.11722156 |
| hsa-miR-3180-3p   | -5.8461076 | 0.03361661  | 0.11722156 |
| hsa-miR-335-3p    | -6.833513  | 0.000667207 | 0.00407148 |
| hsa-miR-490-5p    | -6.969866  | 0.000352487 | 0.00230836 |
| hsa-miR-490-3p    | -7.2091024 | 5.33E-05    | 0.0004207  |
| 8hsa-miR-3180-3p  | -5.8461076 | 0.03361661  | 0.11722156 |

**Table S2.** List of differentially upregulated miRNAs in HULM-EXO compared to UTSM-EXO

| miRNA            | Log FC      | P value     | FDR         |
|------------------|-------------|-------------|-------------|
| hsa-miR-23a-5p   | 5.825600757 | 0.017297867 | 0.067311266 |
| hsa-miR-1244     | 5.658852087 | 0.03361661  | 0.117221556 |
| hsa-miR-6724-5p  | 5.658852087 | 0.03361661  | 0.117221556 |
| hsa-miR-150-5p   | 3.342380532 | 0.002009464 | 0.010790821 |
| hsa-miR-483-5p   | 3.340968643 | 9.33E-10    | 1.28E-08    |
| hsa-miR-96-5p    | 2.23550084  | 0.001905282 | 0.010334711 |
| hsa-miR-222-5p   | 2.157393072 | 0.010113281 | 0.042762455 |
| hsa-miR-25-5p    | 2.151013595 | 0.004181329 | 0.020412488 |
| hsa-miR-106b-5p  | 2.083186416 | 0.041975388 | 0.14357187  |
| hsa-miR-671-3p   | 1.991038057 | 0.041975388 | 0.14357187  |
| hsa-miR-483-3p   | 1.732686365 | 0.00108952  | 0.006429366 |
| hsa-miR-301a-3p  | 1.688598524 | 0.000282516 | 0.001945013 |
| hsa-miR-142-3p   | 1.641688378 | 1.99E-14    | 3.82E-13    |
| hsa-miR-126-3p   | 1.610200192 | 8.64E-13    | 1.60E-11    |
| hsa-miR-29b-1-5p | 1.599557063 | 0.034844927 | 0.120720812 |
| hsa-miR-486-5p   | 1.573487885 | 1.33E-12    | 2.39E-11    |
| hsa-miR-122-5p   | 1.565230091 | 1.80E-11    | 2.85E-10    |
| hsa-miR-129-5p   | 1.555694143 | 0.002593418 | 0.013263481 |
| hsa-miR-182-5p   | 1.461648808 | 6.78E-05    | 0.00051268  |
| hsa-miR-183-5p   | 1.441585693 | 0.023844974 | 0.087703774 |
| hsa-miR-17-5p    | 1.441585693 | 0.023844974 | 0.087703774 |
| hsa-miR-142-5p   | 1.393506727 | 2.19E-08    | 2.80E-07    |
| hsa-miR-223-3p   | 1.328928957 | 0.000807467 | 0.004817886 |
| hsa-miR-1306-5p  | 1.285320937 | 0.004406531 | 0.021318082 |
| hsa-let-7i-5p    | 1.253668609 | 3.66E-09    | 4.79E-08    |
| hsa-miR-101-3p   | 1.242125979 | 1.37E-07    | 1.60E-06    |
| hsa-miR-18a-5p   | 1.228171743 | 0.02594261  | 0.094207926 |
| hsa-miR-144-5p   | 1.225458383 | 4.08E-05    | 0.000342382 |
| hsa-miR-199b-5p  | 1.2051242   | 0.00398251  | 0.019620256 |
| hsa-miR-93-5p    | 1.193607476 | 8.15E-08    | 9.73E-07    |
| hsa-miR-151a-5p  | 1.188763663 | 0.02294735  | 0.086779768 |
| hsa-miR-494-3p   | 1.157946784 | 0.002989694 | 0.015145902 |
| hsa-miR-155-5p   | 1.150942157 | 4.55E-06    | 4.21E-05    |
| hsa-miR-126-5p   | 1.099380132 | 3.10E-05    | 0.000264508 |
| hsa-miR-16-5p    | 1.087643177 | 1.66E-07    | 1.86E-06    |
| hsa-miR-92a-3p   | 1.008295903 | 5.98E-06    | 5.44E-05    |
| hsa-miR-148a-3p  | 1.007272756 | 0.002265509 | 0.012045332 |
| hsa-miR-487b-3p  | 0.963198953 | 0.047810735 | 0.160464778 |
| hsa-miR-25-3p    | 0.866205963 | 6.62E-05    | 0.000507991 |
| hsa-miR-144-3p   | 0.844947407 | 0.00023011  | 0.001625908 |
| hsa-miR-382-5p   | 0.833937717 | 0.003216573 | 0.015993515 |

|                |             |             |             |
|----------------|-------------|-------------|-------------|
| hsa-miR-194-5p | 0.81067085  | 0.045967706 | 0.155249422 |
| hsa-miR-451a   | 0.775002044 | 0.000608198 | 0.003888126 |
| hsa-miR-432-5p | 0.723622781 | 0.016613321 | 0.067077846 |
| hsa-miR-379-5p | 0.678468518 | 0.020651183 | 0.079212037 |
| hsa-miR-20a-5p | 0.665026875 | 0.023269266 | 0.08738179  |
| hsa-let-7g-5p  | 0.633042044 | 0.007334363 | 0.032821275 |
| hsa-miR-423-5p | 0.629785733 | 0.005515075 | 0.025530993 |
| hsa-miR-31-5p  | 0.602595019 | 0.007644987 | 0.033928581 |

---
